# Supplementary material for: Temperature- and Diet-Induced Plasticity of Growth and Digestive Enzymes Activity in Spongy Moth Larvae
Source: MDPI journal article supplement (doi:10.3390/biom13050821), 2023-05-11
Supplement: s1 [file s1]

**Table S1.** Results of three-way multivariate and univariate analyses of variance (F and *p* values) assessing main and interaction effects of temperature (T), dietary protein (P) and carbohydrate content (C) on larval fitness-related traits. Significant effects are marked in bold.

|           | MANOVA                     |       |                | df,<br>df <sub>error</sub> | Dev. duration |                | Larval mass |                |
|-----------|----------------------------|-------|----------------|----------------------------|---------------|----------------|-------------|----------------|
|           | df,<br>df <sub>error</sub> | F     | <i>p</i>       |                            | F             | <i>p</i>       | F           | <i>p</i>       |
| T         | 4, 336                     | 68.21 | < <b>0.001</b> | 2, 168                     | 463.61        | < <b>0.001</b> | 43.45       | < <b>0.001</b> |
| P         | 2, 167                     | 34.14 | < <b>0.001</b> | 1, 168                     | 10.47         | <b>0.001</b>   | 63.37       | < <b>0.001</b> |
| C         | 2, 167                     | 2.54  | 0.082          | 1, 168                     | 0.01          | 0.911          | 4.98        | <b>0.027</b>   |
| T × P     | 4, 336                     | 0.06  | 0.994          | 2, 168                     | 0.01          | 0.995          | 0.10        | 0.902          |
| T × C     | 4, 336                     | 0.58  | 0.678          | 2, 168                     | 0.12          | 0.890          | 0.96        | 0.387          |
| P × C     | 2, 167                     | 2.94  | 0.056          | 1, 168                     | 1.74          | 0.190          | 4.77        | <b>0.030</b>   |
| T × P × C | 4, 336                     | 0.41  | 0.802          | 2, 168                     | 0.61          | 0.543          | 0.22        | 0.801          |

**Table S2.** Significance of squared Mahalanobis distances ( $D^2$ ) between treatment groups for fitness-related traits.

A.

| Diet |          | 19 °C vs. 23 °C   | 23 °C vs. 28 °C   |
|------|----------|-------------------|-------------------|
| HpHc | $D^2$    | 15.94             | 6.55              |
|      | F        | 58.35             | 23.97             |
|      | <i>p</i> | <b>&lt; 0.001</b> | <b>&lt; 0.001</b> |
| HpLc | $D^2$    | 13.33             | 9.25              |
|      | F        | 48.81             | 33.87             |
|      | <i>p</i> | <b>&lt; 0.001</b> | <b>&lt; 0.001</b> |
| LpHc | $D^2$    | 9.89              | 6.82              |
|      | F        | 36.20             | 24.98             |
|      | <i>p</i> | <b>&lt; 0.001</b> | <b>&lt; 0.001</b> |
| LpLc | $D^2$    | 7.97              | 4.05              |
|      | F        | 29.19             | 14.82             |
|      | <i>p</i> | <b>&lt; 0.001</b> | <b>&lt; 0.001</b> |

B.

| Temperature |          | HpHc vs. LpLc | HpLc vs. LpHc     |
|-------------|----------|---------------|-------------------|
| 19 °C       | $D^2$    | 0.84          | 2.33              |
|             | F        | 3.11          | 8.57              |
|             | <i>p</i> | 0.053         | <b>&lt; 0.001</b> |
| 23 °C       | $D^2$    | 0.60          | 3.94              |
|             | F        | 2.20          | 14.49             |
|             | <i>p</i> | 0.120         | <b>&lt; 0.001</b> |
| 28 °C       | $D^2$    | 1.29          | 1.83              |
|             | F        | 4.73          | 6.76              |
|             | <i>p</i> | <b>0.013</b>  | <b>0.002</b>      |

**Table S3.** Results of three-way multivariate and univariate analyses of variance assessing main and interaction effects of temperature (T), dietary protein (P) and carbohydrate content (C) on digestive enzyme activities. Significant effects are marked in bold.

|       | df,<br>df <sub>error</sub> | MANOVA |                  | df,<br>df <sub>error</sub> | PA   |              | TRY  |              | ELA  |              | LAP    |                  | AMY   |                  | $\alpha$ -GLUC |                  | LIP   |                  |
|-------|----------------------------|--------|------------------|----------------------------|------|--------------|------|--------------|------|--------------|--------|------------------|-------|------------------|----------------|------------------|-------|------------------|
|       |                            | F      | <i>p</i>         |                            | F    | <i>p</i>     | F    | <i>p</i>     | F    | <i>p</i>     | F      | <i>p</i>         | F     | <i>p</i>         | F              | <i>p</i>         | F     | <i>p</i>         |
| T     | 14, 326                    | 16.44  | <b>&lt;0.001</b> | 2, 168                     | 0.87 | 0.420        | 3.33 | <b>0.038</b> | 6.71 | <b>0.002</b> | 107.08 | <b>&lt;0.001</b> | 0.66  | 0.518            | 8.27           | <b>&lt;0.001</b> | 2.60  | 0.077            |
| P     | 7, 162                     | 39.91  | <b>&lt;0.001</b> | 1, 168                     | 6.12 | <b>0.014</b> | 0.31 | 0.577        | 5.59 | <b>0.019</b> | 24.81  | <b>&lt;0.001</b> | 75.61 | <b>&lt;0.001</b> | 8.81           | <b>0.003</b>     | 19.19 | <b>&lt;0.001</b> |
| C     | 7, 162                     | 2.53   | <b>0.017</b>     | 1, 168                     | 1.85 | 0.175        | 3.45 | 0.065        | 0.60 | 0.439        | 8.55   | <b>0.004</b>     | 0.37  | 0.544            | 0.98           | 0.323            | 0.12  | 0.725            |
| T×P   | 14, 326                    | 1.76   | <b>0.043</b>     | 2, 168                     | 2.68 | 0.071        | 0.77 | 0.465        | 1.39 | 0.253        | 0.43   | 0.654            | 2.13  | 0.122            | 0.85           | 0.427            | 1.2   | 0.303            |
| T×C   | 14, 326                    | 1.66   | 0.063            | 2, 168                     | 2.34 | 0.099        | 0.94 | 0.395        | 0.44 | 0.645        | 2.26   | 0.108            | 4.34  | <b>0.014</b>     | 3.45           | <b>0.034</b>     | 0.00  | 0.998            |
| P×C   | 7, 162                     | 1.38   | 0.217            | 1, 168                     | 0.44 | 0.510        | 0.80 | 0.371        | 0.25 | 0.616        | 1.42   | 0.235            | 1.23  | 0.269            | 1.22           | 0.270            | 0.29  | 0.594            |
| T×P×C | 14, 326                    | 0.59   | 0.870            | 2, 168                     | 0.20 | 0.822        | 0.01 | 0.987        | 0.22 | 0.801        | 0.07   | 0.928            | 0.30  | 0.738            | 1.06           | 0.349            | 0.27  | 0.765            |

**Table S4.** Results of z test for comparisons of specific correlation coefficients and Mantel test for comparison of correlation structures between digestive enzyme activities in larvae reared at (A.) different temperatures (19 °C vs. 23 °C, 23 °C vs. 28 °C) within each diet and (B.) different diets (HpHc vs. LpLc, HpLc vs. LpHc) within each temperature. Significant differences [between specific correlations](#) are presented in [red](#).

A.

|                | HpHc               |                    | HpLc               |                    | LpHc               |                    | LpLc               |                    |
|----------------|--------------------|--------------------|--------------------|--------------------|--------------------|--------------------|--------------------|--------------------|
|                | 19 °C vs.<br>23 °C | 23 °C vs.<br>28 °C | 19 °C vs.<br>23 °C | 23 °C vs.<br>28 °C | 19 °C vs.<br>23 °C | 23 °C vs.<br>28 °C | 19 °C vs.<br>23 °C | 23 °C vs.<br>28 °C |
| PA-TRY         | -0.21              | -0.04              | 1.30               | 0.47               | -0.06              | 0.83               | -0.27              | 0.68               |
| PA-ELA         | -1.62              | 0.47               | 2.05               | 0.36               | -0.32              | 0.28               | -0.27              | 2.38               |
| PA-LAP         | -1.43              | -0.84              | 0.76               | -0.05              | -0.09              | 1.46               | 0.86               | 1.90               |
| PA-AMY         | -0.18              | -0.72              | -0.04              | -0.66              | -0.22              | 0.79               | 1.15               | -0.19              |
| PA-GLUC        | -1.28              | -0.19              | 0.26               | 0.90               | 0.45               | -0.37              | -2.78              | 2.30               |
| PA-LIP         | 0.55               | -1.47              | 0.21               | -0.57              | -0.02              | 1.61               | 0.54               | 0.48               |
| TRY-ELA        | -1.59              | -0.54              | -0.58              | 0.91               | -0.44              | -0.22              | -0.61              | 2.19               |
| TRY-LAP        | -1.27              | -1.45              | 0.09               | -0.91              | -0.39              | 1.41               | 1.36               | 1.78               |
| TRY-AMY        | -1.09              | -0.11              | -0.10              | -1.11              | -0.18              | 0.62               | 1.80               | -0.30              |
| TRY-GLUC       | -1.04              | 0.02               | 1.03               | -0.49              | 0.36               | -0.75              | -2.26              | 1.14               |
| TRY-LIP        | 0.00               | -0.48              | -0.63              | -0.32              | -0.37              | 1.40               | 0.49               | -0.28              |
| ELA-LAP        | -0.69              | -2.07              | 0.98               | -1.82              | -0.22              | 0.80               | 0.65               | 1.19               |
| ELA-AMY        | -1.38              | -0.11              | 0.46               | -2.48              | -0.10              | 0.23               | 1.20               | -1.10              |
| ELA-GLUC       | -1.29              | -0.21              | -0.72              | -0.52              | 0.93               | -0.32              | -2.14              | 2.35               |
| ELA-LIP        | -0.03              | -0.21              | -1.12              | -0.59              | -0.54              | 1.34               | 1.10               | -0.79              |
| LAP-AMY        | -0.32              | -1.92              | -1.85              | 0.24               | 0.89               | 0.15               | 1.89               | -1.20              |
| LAP-GLUC       | -1.77              | 1.38               | 0.19               | -0.95              | 1.15               | -0.61              | -0.67              | 1.51               |
| LAP-LIP        | 1.57               | -1.13              | -0.90              | -0.05              | 0.92               | 0.07               | 0.53               | -1.20              |
| AMY-GLUC       | -0.70              | -0.62              | 0.42               | -0.34              | -0.04              | -1.07              | 1.14               | 0.43               |
| AMY-LIP        | 0.19               | -1.35              | 0.47               | 0.03               | 0.17               | -0.33              | -0.24              | -0.64              |
| GLUC-LIP       | <b>3.28</b>        | -1.25              | -1.18              | 0.16               | -0.55              | 1.66               | 1.15               | 0.06               |
| <i>Mantel:</i> |                    |                    |                    |                    |                    |                    |                    |                    |
| R              | 0.481              | 0.744              | 0.373              | 0.327              | 0.708              | 0.485              | 0.184              | 0.079              |
| <i>p</i>       | <b>&lt;0.001</b>   | <b>&lt;0.001</b>   | <b>0.002</b>       | <b>0.004</b>       | <b>&lt;0.001</b>   | <b>&lt;0.001</b>   | <b>0.024</b>       | 0.146              |

PA - protease activity, TRY – trypsin, ELA – elastase, LAP – leucine aminopeptidase, AMY –  $\alpha$ -amylase,  $\alpha$ -GLUC -  $\alpha$ -glucosidase, LIP - lipase

continue...

B.

|                | 19 °C         |               | 23 °C         |               | 28 °C         |               |
|----------------|---------------|---------------|---------------|---------------|---------------|---------------|
|                | HpHc vs. LpLc | HpLc vs. LpHc | HpHc vs. LpLc | HpLc vs. LpHc | HpHc vs. LpLc | HpLc vs. LpHc |
| PA-TRY         | -0.14         | -1.53         | -0.20         | -2.88         | 0.52          | -2.52         |
| PA-ELA         | -1.03         | -0.09         | 0.32          | -2.46         | 2.22          | -2.54         |
| PA-LAP         | -1.27         | 0.46          | 1.02          | -0.39         | 3.77          | 1.12          |
| PA-AMY         | 0.70          | 0.24          | 2.04          | 0.06          | 2.57          | 1.51          |
| PA-GLUC        | -0.23         | 0.41          | -1.73         | 0.61          | 0.76          | -0.67         |
| PA-LIP         | -0.99         | -0.34         | -0.99         | -0.58         | 0.96          | 1.60          |
| TRY-ELA        | -0.93         | -0.82         | 0.05          | -0.67         | 2.78          | -1.81         |
| TRY-LAP        | -2.41         | 0.16          | 0.23          | -0.31         | 3.46          | 2.00          |
| TRY-AMY        | -0.05         | 0.16          | 2.84          | 0.08          | 2.64          | 1.81          |
| TRY-GLUC       | -0.13         | 1.45          | -1.35         | 0.78          | -0.23         | 0.52          |
| TRY-LIP        | -0.86         | 0.04          | -0.36         | 0.30          | -0.16         | 2.02          |
| ELA-LAP        | -1.77         | 0.86          | -0.44         | -0.34         | 2.82          | 2.28          |
| ELA-AMY        | 0.72          | -0.05         | 3.30          | -0.62         | 2.31          | 2.08          |
| ELA-GLUC       | -1.01         | -0.61         | -1.86         | 1.04          | 0.70          | 1.23          |
| ELA-LIP        | -1.58         | -0.31         | -0.45         | 0.28          | -1.03         | 2.21          |
| LAP-AMY        | -1.40         | -1.71         | 0.80          | 1.02          | 1.53          | 0.93          |
| LAP-GLUC       | -0.49         | -0.07         | 0.61          | 0.89          | 0.74          | 1.24          |
| LAP-LIP        | -0.64         | -0.90         | -1.68         | 0.91          | -1.75         | 1.03          |
| AMY-GLUC       | -1.83         | 0.70          | 0.01          | 0.24          | 1.06          | -0.48         |
| AMY-LIP        | -1.15         | 0.99          | -1.58         | 0.70          | -0.86         | 0.34          |
| GLUC-LIP       | 1.35          | -0.79         | -0.79         | -0.15         | 0.52          | 1.35          |
| <i>Mantel:</i> |               |               |               |               |               |               |
| R              | 0.484         | 0.563         | 0.263         | 0.563         | 0.044         | 0.130         |
| p              | <0.001        | <0.001        | 0.006         | <0.001        | 0.252         | 0.115         |

PA - protease activity, TRY – trypsin, ELA – elastase, LAP – leucine aminopeptidase, AMY –  $\alpha$ -amylase,  
 $\alpha$ -GLUC -  $\alpha$ -glucosidase, LIP - lipase

**Table S5.** Significance of squared Mahalanobis distances ( $D^2$ ) between treatment groups for digestive enzyme activities.

A.

| Diet |       | 19 °C vs. 23 °C   | 23 °C vs. 28 °C   |
|------|-------|-------------------|-------------------|
| HpHc | $D^2$ | 11.14             | 1.66              |
|      | F     | 10.23             | 1.52              |
|      | $p$   | <b>&lt; 0.001</b> | 0.192             |
| HpLc | $D^2$ | 11.99             | 1.69              |
|      | F     | 11.01             | 1.55              |
|      | $p$   | <b>&lt; 0.001</b> | 0.182             |
| LpHc | $D^2$ | 6.60              | 6.11              |
|      | F     | 6.06              | 5.62              |
|      | $p$   | <b>&lt; 0.001</b> | <b>&lt; 0.001</b> |
| LpLc | $D^2$ | 7.10              | 4.76              |
|      | F     | 6.52              | 4.37              |
|      | $p$   | <b>&lt; 0.001</b> | <b>0.001</b>      |

B.

| Temperature |       | HpHc vs. LpLc     | HpLc vs. LpHc     |
|-------------|-------|-------------------|-------------------|
| 19 °C       | $D^2$ | 12.37             | 5.87              |
|             | F     | 11.84             | 5.62              |
|             | $p$   | <b>&lt; 0.001</b> | <b>&lt; 0.001</b> |
| 23 °C       | $D^2$ | 7.26              | 17.60             |
|             | F     | 6.94              | 16.84             |
|             | $p$   | <b>&lt; 0.001</b> | <b>&lt; 0.001</b> |
| 28 °C       | $D^2$ | 7.27              | 6.83              |
|             | F     | 6.96              | 6.53              |
|             | $p$   | <b>&lt; 0.001</b> | <b>&lt; 0.001</b> |
